# Supplementary material
Source: Springer Nature journal article supplement (https://www.springermedizin.de/resource/supplementary/13098_2010_92_MOESM2_ESM.pdf/9670494)

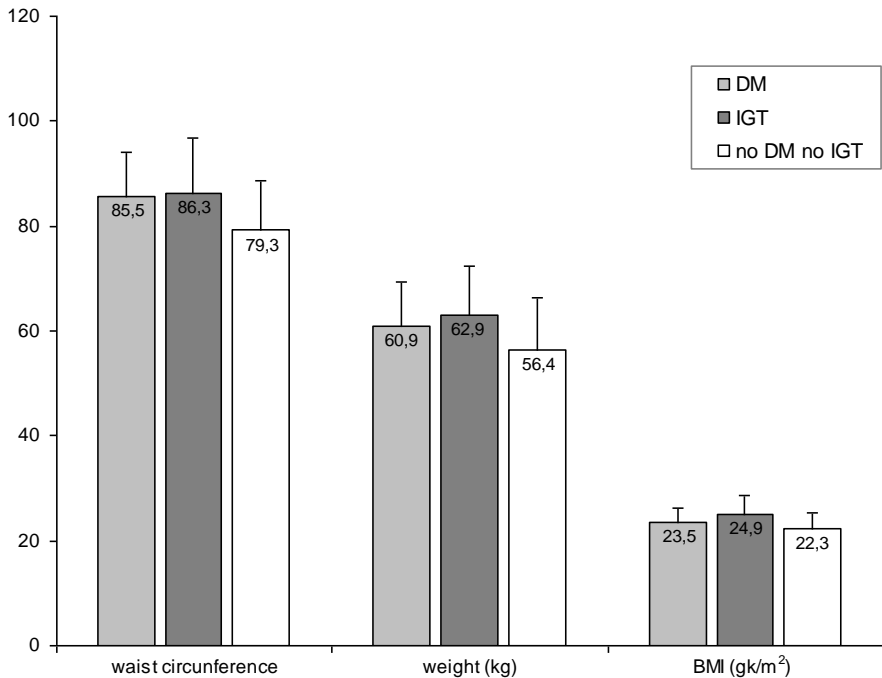

Supplement: MOESM2 [file 9670494]
